1

2

## **Diel Investments in Phytoplankton Metabolite Production Influenced by**

3

## **Associated Heterotrophic Bacteria**

4

5

6

Mario Uchimiya<sup>1,2</sup>, William Schroer<sup>1</sup>, Malin Olofsson<sup>1</sup>,

7

Arthur S. Edison<sup>2</sup>, Mary Ann Moran<sup>1,\*</sup>

8

9

10 <sup>1</sup>Department of Marine Sciences, University of Georgia, Athens, GA, 30602, US

11 <sup>2</sup>Complex Carbohydrate Research Center, University of Georgia, Athens, GA, 30602, US

12

13

14 Running Head: Phytoplankton Metabolite Production Influenced by Associated Bacteria

15

16 \*Corresponding Author: Mary Ann Moran, Department of Marine Sciences, University of Georgia, Athens,

17 GA 30602-3636, US, [mmoran@uga.edu](mailto:mmoran@uga.edu), 706-542-6481

## 18 **Abstract**

19       Organic carbon transfer between photoautotrophic and heterotrophic microbes in the surface  
20 ocean mediated through metabolites dissolved in seawater is a central but poorly understood  
21 process in the global carbon cycle. In a synthetic microbial community in which diatom extracellular  
22 release of organic molecules sustained growth of a co-cultured bacterium, metabolite transfer was  
23 assessed over two diel cycles based on per cell quantification of phytoplankton endometabolites  
24 and bacterial transcripts. Of 31 phytoplankton endometabolites identified and classified into  
25 temporal abundance patterns, eight could be matched to patterns of bacterial transcripts mediating  
26 their uptake and catabolism. A model simulating the coupled endometabolite-transcription  
27 relationships hypothesized that one category of outcomes required an increase in phytoplankton  
28 metabolite synthesis in response to the presence of the bacterium. An experimental test of this  
29 hypothesis confirmed higher endometabolome accumulation in the presence of bacteria for all five  
30 compounds assigned to this category – leucine, glycerol-3-phosphate, glucose, and the organic  
31 sulfur compounds dihydroxypropanesulfonate and dimethylsulfoniopropionate. Partitioning of  
32 photosynthate into rapidly-cycling dissolved organic molecules at the expense of phytoplankton  
33 biomass production has implications for carbon sequestration in the deep ocean. That heterotrophic  
34 bacteria can impact this partitioning suggests a previously unrecognized influence on the ocean's  
35 carbon reservoirs.

36

## 37 **Significance Statement**

38       Microbes living in the surface ocean are critical players in the global carbon cycle, carrying  
39 out a particularly key role in the flux of carbon between the ocean and atmosphere. The release of  
40 metabolites by marine phytoplankton and their uptake by heterotrophic bacteria is one of the major

41 routes of microbial carbon turnover. Yet the identity of these metabolites, their concentration in  
42 seawater, and the factors that affect their synthesis and release are poorly known. Here we provide  
43 experimental evidence that marine heterotrophic bacteria can affect phytoplankton production and  
44 extracellular release of metabolites. This microbial interaction has relevance for the partitioning of  
45 photosynthate between dissolved and particulate carbon reservoirs in the ocean, an important  
46 factor in oceanic carbon sequestration.

## 47 **Introduction**

48 Photoautotroph-heterotroph metabolite transfer in the surface ocean is a key process in global  
49 carbon cycling through which up to half of fixed carbon is transferred to bacteria in the form of  
50 labile dissolved compounds<sup>1</sup>. Phytoplankton synthesis and release of metabolites exhibit diel cycles,  
51 synchronized with the availability of light energy<sup>2-4</sup>. The observation of similar diel activity cycles in  
52 co-occurring heterotrophic bacteria suggests a tight temporal linkage controlled by the timing of  
53 phytoplankton extracellular release<sup>5,6</sup>. Though the importance of the trophic link between marine  
54 phytoplankton and bacteria in the global carbon cycle has long been recognized<sup>7-9</sup>, identifying the  
55 metabolites responsible and measuring their flux is challenging. These compounds have short  
56 turnover times in seawater due to rapid uptake by bacteria, have shared physical properties with  
57 salt, and are maintained at low, typically nmol L<sup>-1</sup> to pmol L<sup>-1</sup>, concentrations<sup>10,11</sup>.

58 Intracellular phytoplankton metabolite pools (endometabolites) are the presumptive substrates  
59 for heterotrophic bacteria, yet how faithfully phytoplankton internal concentrations predict  
60 exometabolite availability depends on the mechanism of release, of which several have been  
61 recognized<sup>12,13</sup>. In the simplest mechanism, differences in metabolite concentration between  
62 phytoplankton intracellular pools and ambient seawater can drive diffusion<sup>14</sup> (i.e., passive diffusion  
63 mechanism), in which case substrate supply to heterotrophic bacteria is largely controlled by  
64 endometabolite concentrations. Alternatively, active excretion of metabolites to maintain cellular  
65 balance can occur by overflow pathways<sup>15</sup>, for example to manage redox state or products of  
66 photorespiration (i.e., physiological balance mechanism). Finally, metabolites may be synthesized  
67 and excreted in response to associated microbes, for example to sustain mutualisms or mount  
68 defenses<sup>16,17</sup> (i.e., interaction response mechanism).

69 Here we determined the correspondence between phytoplankton intracellular pools and  
70 heterotrophic bacterial substrate availability by examining diel patterns of endometabolomes and  
71 transcriptomes. A synthetic community was established in which marine diatom *Thalassiosira*  
72 *pseudonana* CCMP1335<sup>18</sup> was the only source of substrates to bacterium *Ruegeria pomeroyi* DSS-3<sup>19</sup>.  
73 As diatoms contribute up to 40% of primary production in the surface ocean<sup>20</sup> and *R. pomeroyi*  
74 belongs to a taxon that dominates diatom bloom communities<sup>21,22</sup>, this simple community  
75 represents a key phytoplankton-bacteria link in the surface ocean. Over two day-night cycles, we  
76 contemporaneously assayed phytoplankton endometabolite pools by nuclear magnetic resonance  
77 (NMR) spectroscopy and bacterial metabolite consumption using transcriptome proxies and  
78 assessed links between the two. Transcript abundance was analyzed as the number of mRNA  
79 molecules per bacterial cell, enabled by the use of internal mRNA standards; this approach yields  
80 the absolute number of transcripts harbored by a cell for a given gene, matching absolute  
81 quantitation in the metabolite data and eliminating ambiguities inherent in proportional expression  
82 data<sup>23,24</sup>. The quantitative chemical-biological analytical framework applied to this synthetic  
83 community enabled us to assess mechanisms underlying temporal links between microbial  
84 autotrophs and heterotroph in the production and consumption of labile metabolites.

85

## 86 **Results and Discussion**

87 *T. pseudonana* cultures were grown axenically under naturally oscillating light intensity during a  
88 16 h:8 h light:dark cycle, with maximum at noon. After 6 d, *R. pomeroyi* was inoculated into the  
89 cultures, and a 2-day pre-incubation followed to allow the bacteria to assimilate labile metabolites  
90 that accumulated during the axenic phase. Beginning on day 8, samples were collected every 6 h for  
91 the next 48 h at timepoints corresponding to midnight, mid-morning, noon, and mid-afternoon.

92 *Diatom metabolome composition* – NMR characterization of the diatom endometabolome  
93 during the 48 h sampling window revealed 282 major peaks absent in the blank spectrum.  
94 Annotation by comparison to metabolomic databases and chemical standards suggested by previous  
95 studies<sup>25,26</sup> resulted in 31 compounds (156 peaks) identified with high confidence (Table 1; see Table  
96 S1 and Fig. S1 for detailed annotation and confidence level information). The number of diatom cells  
97 increased ~2-fold over the sampling window, from 0.87 to  $1.9 \times 10^5$  cells mL<sup>-1</sup> (Fig. 1a); metabolite  
98 data were normalized to cell number at the time of sampling.

99 To group metabolite peaks that behaved similarly over the diel cycles, cell-normalized absolute  
100 abundance data were clustered by variance-sensitive clustering<sup>27</sup> which identified four patterns (Fig.  
101 1b and 1c; Table 1). Group M-1 consisted of metabolites for which monotonic increases in intensity  
102 dominated the 48 h sampling window. Twelve compounds annotated with high confidence from this  
103 cluster included amino acids (asparagine, glycine, isoleucine, leucine, and lysine), amino acid  
104 derivatives (glycine betaine and homarine), an amino alcohol (ethanolamine), a choline derivative  
105 (phosphorylcholine), a glycerol derivative (glycerol-3-phosphate), and the sulfur-containing  
106 compounds dihydroxypropanesulfonate (DHPS) and dimethylsulfoniopropionate (DMSP) (Table 1,  
107 Fig. S2). Metabolite group M-2 was characterized by peaks for which decreases in concentrations  
108 over time was the dominant pattern, and included two organic acids (3-hydroxybutyrate, acetate)  
109 and one unidentified organic acid. The two other metabolite clusters exhibited diel concentration  
110 patterns that peaked in the light and declined in the dark (Table 1, Fig. S2). Group M-3 peaks  
111 reached their maximum intensities at mid-afternoon (RAIN,  $p \leq 0.001$ ) and contained high-  
112 confidence annotations of the nucleoside uridine and the carbohydrates glucose and  $\beta$ -1,3-glucan,  
113 the latter a subunit of the major diatom polysaccharide laminarin<sup>28</sup>. Group M-4 peaks exhibited diel  
114 patterns with maximum intensities at mid-morning or noon (RAIN,  $p \leq 0.01$ ) and included high  
115 confidence annotations for the amino acids aspartate, glutamine, and proline. Thus four distinct

116 temporal patterns of endometabolite concentrations were observed for *T. pseudonana* cells co-  
117 growing with a heterotrophic bacterium under a light regime mimicking that of the surface ocean  
118 (Fig. 1b).

119 *Bacterial transcription patterns* – We next examined concurrent bacterial transcript inventories  
120 indicative of metabolite consumption, normalized to cell counts at the time of sampling (Fig. 1a).  
121 The total number of transcripts cell<sup>-1</sup> varied significantly over the diel cycle (ANOVA; n = 26, p < 0.01),  
122 with ~2.5-fold more mRNAs in the mid-morning and noon cells (95 ± 49 and 114 ± 53 mRNAs cell<sup>-1</sup>)  
123 relative to mid-afternoon and night (42 ± 11 and 58 ± 25 mRNAs cell<sup>-1</sup>). Correspondingly, the  
124 majority of genes had higher transcripts per cell at mid-morning and noon relative to mid-afternoon  
125 and night (Fig. S3). This transcript inventory is low compared to exponentially growing *Escherichia*  
126 *coli* (1,350 mRNAs cell<sup>-1</sup>; ref<sup>29</sup>) but comparable to previous measures for marine bacteria in ocean  
127 environments<sup>24</sup>.

128 To identify genes that behaved similarly over time, the per cell transcript inventories for each of  
129 the 4,278 protein-encoding genes in the *R. pomeroyi* genome were clustered by variance-sensitive  
130 clustering (Fig. 1b and c). Among the genes encoding substrate transporters, the majority (87%)  
131 were classified into Group G-1 (3,294 total genes, 539 transporter genes), for which the  
132 transcription pattern was a diel cycle with a maximum value at noon (Fig. 2). G-1 transporters  
133 showing the largest diel shifts in expression encoded the uptake of sugars (e.g., ribose), amino acid  
134 derivatives (ectoine and 5-hydroxyectoine), amines (trimethylamine, trimethylamine-N-oxide, and  
135 spermidine), an organic acid (glycolate), a purine (xanthine), phosphonates, and organic sulfur  
136 compounds (DHPS, isethionate, cysteate, *N*-acetyltaurine, choline-*O*-sulfate, and DMSP); for these  
137 compounds, bacteria expressed 13- to 58-fold more transcripts per cell at noon relative to night  
138 (mean ratio: 33.5 ± 11.7, n = 50) (Fig. 2). Transporters with less extreme diel swings in expression but  
139 still biased toward noon encoded uptake of taurine, glucose, and *sn*-glycerol-3-phosphate, with

140 noon-night expression ratios an order of magnitude lower (mean ratio:  $3.3 \pm 1.3$ ,  $n = 11$ ). For these,  
141 the dampened diel expression dynamics were due to high night transcript inventories rather than  
142 low noon inventories (Fig. 2), suggesting their targets were among the more available substrates at  
143 night. Group G-2, for which the temporal transcription pattern was similar to G-1 but with higher  
144 values at the first night and mid-morning time points, contained 11% of transporter genes (756 total  
145 genes, 68 transporter genes) (Fig. 1c). Group G-3, for which diel patterns were not dominant but,  
146 similar to G-2, the first night and mid-morning values were high (Fig. 1c), contained 2% of  
147 transporter genes (271 total genes, 10 transporter genes). Putrescine, glycine betaine/proline, and  
148 choline transporter proteins were classified in G-2 or G-3. Higher transcript inventories at initial time  
149 points could reflect incomplete bacterial drawdown of an accumulated metabolite during the pre-  
150 incubation.

151 Bacterial transporter expression was also calculated as a percent of the total transcriptome (Fig.  
152 S4), the prevailing analysis approach for RNAseq data<sup>30</sup> when internal standards are not available.  
153 Relative investment calculations categorized 51% of transporter genes as significantly enriched in  
154 the noon transcriptome relative to night, compared to 81% significantly higher per cell transcript  
155 inventories at noon relative to night for the internal standard-based approach (Fig. S4). These  
156 analyses emphasize, on the one hand, the bacterium's investment in expression of a transporter  
157 relative to other cellular functions, and on the other, the actual number of templates available for  
158 synthesizing transporter proteins.

159 *Diel oscillations in photosynthesis parameters* – We noticed that *R. pomeroyi* produced many-  
160 fold fewer transcripts for substrate acquisition in the mid-afternoon compared to mid-morning (Fig.  
161 2), despite the fact that illumination was identical. Indeed, >75% of the bacterium's transporter  
162 genes had transcript inventories that were statistically indistinguishable between mid-afternoon and  
163 night (Fig. S3). Diel oscillations in the relationship between carbon fixation rate and irradiance have



164 been broadly documented for marine phytoplankton in laboratory and field studies, characterized  
165 by pre-noon maxima in photosynthesis rates<sup>31,32</sup>. Thus the rapid decrease in expression of most  
166 bacterial transporters by mid-afternoon suggests that periodicity in carbon fixation-irradiance  
167 relationships are manifested in phytoplankton extracellular release as well. One feature of diel  
168 photosynthesis oscillation, the  $E_k$ -dependent variability in photosynthesis parameters, is  
169 hypothesized to result from a metabolic shift by phytoplankton from pre-noon synthesis of amino  
170 acid and lipids to post-noon synthesis of storage carbohydrates and nucleic acids<sup>33,34</sup>. The *T.*  
171 *pseudonana* endometabolome concentrations were fully consistent with this hypothesis; high  
172 confidence metabolites assigned to group M-4 (maximum concentrations at mid-morning or noon)  
173 are proline, aspartate, and glutamine, and to group M-3 (maximum concentrations at mid-  
174 afternoon) are glucose,  $\beta(1,3)$ -glucan storage molecules, and uridine (Fig. S2 and S5). Previously  
175 observed offsets in diel timing of maximum transcription by distinct surface ocean bacterial taxa<sup>5</sup>  
176 could thus reflect changes in the composition of phytoplankton extracellular release.

177 *Control for direct effects of light* – Although no light-sensing proteins have been definitively  
178 identified in the *R. pomeroyi* genome, we assessed whether light could be directly responsible for  
179 changes in gene expression. The bacterium was inoculated into spent medium from axenic *T.*  
180 *pseudonana* and exposed in triplicate to one of three light levels matching co-culture irradiance at  
181 noon, mid-morning/mid-afternoon, and night for 4 h. Only 61 genes in the bacterial culture (1.4% of  
182 the *R. pomeroyi* genome) were significantly enriched by one or both light levels (Fig. S6), indicating  
183 that diel differential expression in the co-cultures was primarily mediated indirectly through  
184 phytoplankton activities. One group of 10 light-enriched genes function in protection against  
185 reactive oxygen species (ROS) (Fig. S7, Table S2), which can be formed when light interacts with  
186 oxygen or organic compounds<sup>35-37</sup>. A second group of 16 enriched genes function in the uptake and  
187 metabolism of phosphate (*pstSCAB*, *phoU*), and phosphonate (*phnDEC*, *phnIGHLJN*) (Fig. S7), and

188 were likely under the control of the similarly enriched *phoB* regulatory protein<sup>38-40</sup>. Phosphorus  
189 acquisition transcript enrichment was surprising, since phosphorus availability was identical at all  
190 light levels, and phosphate concentrations remain non-limiting for many weeks in this synthetic  
191 culture system ( $>10 \mu\text{mol L}^{-1}$ )<sup>26</sup>. This raises the possibility of light-dependent stimulation of  
192 phosphorus acquisition by bacteria that compete with phytoplankton for nutrients<sup>41</sup>, consistent with  
193 temporal partitioning of nutrient uptake observed in ocean data<sup>42</sup>, and potentially triggered by  
194 seawater ROS concentrations.

195 *Coincidence of diatom metabolite accumulation and bacterial transcription* – Eight metabolites  
196 that were represented in the diatom endometabolome dataset had genes recognized to mediate  
197 their uptake or catabolism in the bacterial transcriptome dataset (Table 2). For four of these (leucine,  
198 glycerol-3-phosphate, DHPS, and DMSP), an increasing endometabolome concentration was paired  
199 with a diel gene expression pattern (Figs. 3a, S8). One (proline) exhibited a noon peak in both  
200 endometabolome concentration and gene expression; two (glucose and uridine) exhibited mid-  
201 afternoon peaks in endometabolome concentration that lagged noon peaks in gene expression by 6  
202 h; and one (acetate) exhibited a decreasing endometabolome concentration paired with diel gene  
203 expression (Fig. 3a).

204 We asked whether the observed paired data patterns could occur under a null model of  
205 changing phytoplankton exometabolite release following bacterial inoculation; that is, with no  
206 mechanism for increased phytoplankton excretion in response to neighboring microbes. A  
207 simulation model was used to compute phytoplankton exometabolite release using functions  
208 representing two of the proposed mechanisms of extracellular release, passive diffusion and  
209 physiological balance, but not the interaction response mechanism (Fig. 3d). To simulate  
210 transcription, the model assumed that *R. pomeroyi* transporter systems are regulated by the  
211 availability of their substrate, which has been supported in previous studies<sup>43-47</sup>. Thus bacterial

212 transcript inventories were taken as the simulated exometabolite uptake rate, according to  
213 Michaelis-Menten kinetics. The model successfully recapitulated three of the four experimental  
214 patterns of paired metabolome concentration and transporter expression data (Fig. 3b left; Table  
215 S3). The pattern that could not be generated with the base model was that of increasing  
216 endometabolome concentrations (M-1) paired with diel gene expression (G-1), which was observed  
217 for leucine, glycerol-3-phosphate, DHPS, and DMSP (Fig. 3b left) (Pearson's  $r = -0.41$  to  $-0.10$ ).  
218 However, addition of a phytoplankton interaction response mechanism that increased  
219 endometabolite production rate upon bacterial inoculation enabled the model output to mimic the  
220 M-1, G-1 pattern (Fig. 3b right). We noticed that output for glucose (M-3, G-1) insufficiently  
221 captured the temporal trend of endometabolome concentration (Fig. 3b left; Table S3), and further  
222 analysis identified a significant linear increase in glucose concentrations ( $p \leq 0.001$ ) embedded  
223 within a significant diel pattern (RAIN,  $p \leq 0.01$ ). Implementation of a phytoplankton interaction  
224 response also improved simulation of the glucose data (Fig. 3b right).

225       The simulation modeling generated a hypothesis that diatoms accumulate higher concentrations  
226 of certain endometabolites in the presence of heterotrophic bacteria. This was tested using an  
227 available independent dataset in which *T. pseudonana* was grown in co-culture with bacteria (*R.*  
228 *pomeroyi* and two other heterotrophic bacteria) for 15 d, after which endometabolites were  
229 compared with those in axenic controls. Consistent with model predictions, all five endometabolites  
230 that increased in concentration in the diel study also had higher concentrations in co-culture  
231 endometabolomes compared to axenic in the 15 d study (Fig. 3c). For the three metabolites that did  
232 not increase in concentration during the diel study (acetate, uridine, and proline) there was no  
233 difference in endometabolite concentrations in the 15 d study (Fig. 3c; see also Fig. S9 for other  
234 compounds). How *T. pseudonana* might detect associated bacteria is not yet known, but could  
235 involve signals released from the bacteria or by bacterial alteration of environmental conditions,

236 such as nutrient pools. Previous research uncovered a phytoplankton-bacteria signaling system in  
237 which a marine diatom (*Pseudo-nitzschia multiseriata*) released tryptophan extracellularly, and a co-  
238 cultured marine bacterium (*Sulfitobacter* sp. S11) converted it to the plant hormone indole-3-acetic  
239 acid. In our model system, bacterium *R. pomeroyi* (a relative of *Sulfitobacter* sp. S11, both members  
240 of the Roseobacter group) maintained 7- to 36-fold higher transcript inventories of IAA synthesis  
241 genes at noon relative to night (Fig. 4a). Further, expression of these same IAA genes was positively  
242 correlated with diatom biomass when *R. pomeroyi* was introduced at intervals into a natural  
243 phytoplankton bloom<sup>48</sup> (Fig. 4b). These suggest both that IAA may play a role in a *T. pseudonana* - *R.*  
244 *pomeroyi* interaction, and that IAA signaling may broadly underlie marine diatom-bacteria  
245 interactions in the surface ocean<sup>16</sup>. Our observation that concentrations increase only for certain  
246 components of the diatom exometabolome is consistent with evolutionary tuning through selection.

247 A major fraction of the ocean's annual net primary production is processed through the labile  
248 dissolved organic carbon pool, driven by the production, release, and consumption of microbial  
249 metabolites<sup>9</sup>. In agreement with previous field observations of coincident diel patterns of  
250 phytoplankton and bacterial activity<sup>5,42,49</sup>, we find coupling of phytoplankton endometabolite  
251 dynamics with bacterial exometabolite uptake transcription in a model system representative of  
252 diatom-dominated surface ocean ecosystems. The quantitative importance of marine  
253 phytoplankton-bacteria carbon flux has motivated inquiries into the physical and chemical factors  
254 that regulate phytoplankton extracellular release, such as light, temperature, and nutrient  
255 limitation<sup>33</sup>. This study suggests that heterotrophic bacteria also influence this process, with  
256 implications for ocean carbon sequestration via allocation of photosynthate between dissolved and  
257 particulate organic carbon reservoirs.

258

## 259 **Materials and Methods**

260 *Diel experiment* – An axenic strain of marine diatom *Thalassiosira pseudonana* CCMP1335  
261 was cultured at 18 °C in three replicate 15-L polycarbonate bottles containing 10 L of L1 medium<sup>50</sup> in  
262 which NaH<sup>13</sup>CO<sub>3</sub> (Cambridge Isotope Laboratories, CLM-441) was used as the source of inorganic  
263 carbon. The light cycle consisted of 16 h light, during which light intensity varied gradually between  
264 0 and 150  $\mu\text{mol photon m}^{-2} \text{ s}^{-1}$  with a maximum intensity at noon, followed by 8 h of dark. Bacterial  
265 strain *Ruegeria pomeroyi* DSS-3 was grown at 30°C on ½ YTSS agar and transferred to ½ YTSS liquid  
266 medium for overnight growth. Axenic *T. pseudonana* cultures grown for 6 days were inoculated with  
267 bacterial cells washed in L1 medium three times (final concentration, 10<sup>6</sup> bacterial cells mL<sup>-1</sup>). Co-  
268 cultures were pre-incubated for two days to allow time for accumulated labile phytoplankton  
269 metabolites to be consumed by the bacteria and thus emphasize synchronized production and  
270 consumption dynamics during diel cycles. After the pre-incubation period, samples were collected  
271 every 6 h over the next 48 h for bacterial mRNA sequencing, phytoplankton and bacterial cell counts,  
272 and phytoplankton endometabolome analysis.

273 *Direct light effects experiment* – *T. pseudonana* CCMP1335 was axenically cultured in 10 L of  
274 L1 medium in a 15-L polycarbonate bottle with incubation conditions as described above except that  
275 an intensity of 150  $\mu\text{mol photon m}^{-2} \text{ s}^{-1}$  was used throughout the light period. After one week, the  
276 diatom cultures were sequentially filtered through GF/F filters (Whatman) and 0.2- $\mu\text{m}$ -pore-size  
277 PCTE membrane filters (Poretics), and the cell-free filtrate was used as the substrate for a bacterial  
278 monoculture experiment. *R. pomeroyi* DSS-3 cells were prepared and added to the filtrate as  
279 described above. Cells were incubated for 4 h at 18°C under light intensities of 150 (100%  
280 treatment), 75 (50% treatment), or 0  $\mu\text{mol photon m}^{-2} \text{ s}^{-1}$  (0% treatment), corresponding to light  
281 levels at noon, mid-morning and mid-afternoon, and night in the diel experiment, with three  
282 replicates of each treatment. A minor temperature increase of 0.5°C occurred in the 100%

283 treatment relative to 50% and 0% treatments. After 4 h, samples for bacterial RNA analysis and cell  
284 counts were collected.

285 *Diatom endometabolome analysis* – Diatom cells were collected by filtering 500 mL of  
286 culture onto 2.0- $\mu\text{m}$ -pore-size PCTE membrane filters (MilliporeSigma Isopore) and stored at  $-80^{\circ}\text{C}$   
287 until processing. Endometabolites were extracted by sonication in ultra-pure water (Millipore),  
288 concentrated by freeze-drying, and dissolved in 600  $\mu\text{L}$  of sodium phosphate buffer (pH 7.4) with an  
289 internal standard of 2,2-dimethyl-2-silapentane-5-sulfonate- $\text{d}_6$  (1  $\text{mmol L}^{-1}$ )<sup>51</sup>. Metabolites were  
290 analyzed by nuclear magnetic resonance (NMR) spectroscopy using a Bruker AVANCE III 800 MHz 5  
291 mm TCI cryoprobe, 800 MHz 1.7 mm TCI cryoprobe, and 600 MHz 5 mm TXI probe. Pulse programs  
292 of  $^1\text{H}$ - $^{13}\text{C}$  heteronuclear single quantum correlation (HSQC; Bruker program hsqcetgpprsisp2.2),  $^1\text{H}$ -  
293  $^{13}\text{C}$  HSQC-total correlation spectroscopy (HSQC-TOCSY; hsqcdietgpsisp.2), and  $^1\text{H}$ - $^{13}\text{C}$  heteronuclear  
294 multiple bond correlation (HMBC; hmbcetgpl2nd) were used. Data were processed using TopSpin  
295 4.0.3 (Bruker), and peak intensity was extracted using rNMR 1.1.9<sup>52</sup>. Metabolites were annotated  
296 based on chemical shift (HSQC) and coupling information (HSQC-TOCSY and HMBC). HMDB<sup>53</sup> and  
297 BMRB<sup>54</sup> were used as reference databases, and additionally CSDB<sup>55</sup> for polysaccharides. Three  
298 compounds of interest which are not in these databases were annotated either by obtaining original  
299 spectra from chemical standards (DHPS and DMSP)<sup>56</sup> or based on literature values<sup>57</sup>. Confidence  
300 level of annotation ranging from 1 (lowest) to 5 (highest) was assigned to each metabolite (Table S1)  
301 according to Walejko et al<sup>58</sup> with a slight modification, where 1 = putative compounds with  
302 functional group information; 2 = partially matched to HSQC chemical shift information in the  
303 databases or literature; 3 = matched to HSQC chemical shift; 4 = matched to HSQC chemical shift  
304 and validated by HSQC-TOCSY or HMBC; 5 = validated by original spectra from chemical standards.  
305 Detailed parameter settings are presented in Table S4, with additional information in Metabolomics  
306 Workbench (ID PR001019, [dx.doi.org/10.21228/M80408](https://dx.doi.org/10.21228/M80408)). Temporal variations in metabolites were

307 analyzed by extracting peaks behaving similarly during the incubation period using variance-  
308 sensitive clustering<sup>27</sup> after normalization by the internal standard and cell counts, and scaling to Z-  
309 scores. Background signals originating from filters and solvent were also corrected. The optimal  
310 cluster number was selected based on minimum centroid distance and Xie-Beni index, and only  
311 membership values of <0.5 were accepted<sup>27</sup>. Periodicity of the temporal patterns for compounds was  
312 analyzed using a rhythmicity analysis package RAIN (1.18.0)<sup>59</sup> in R software (version 3.6.1).  
313 Heatmaps were created using the CirHeatmap function (version 1.7) in MATLAB (Mathworks)<sup>60</sup>.

314 *mRNA analysis* – For the direct light experiment, bacterial cells were collected by filtering  
315 500 mL of culture through 0.2- $\mu$ m pore-size PES membrane filters (Pall Supor) and immediately  
316 freezing the filters in liquid nitrogen. For the diel experiment, samples were pre-filtered through 2.0-  
317  $\mu$ m-pore-size PCTE membrane filters (MilliporeSigma Isopore) to retain diatom cells prior to  
318 capturing bacterial cells on 0.2- $\mu$ m pore-size filters. This process was completed within 15 min of  
319 collection. The filters were stored at -80°C until processing. To extract RNA, filters were cut into  
320 pieces under sterile conditions and shaken with 0.5 mL of 0.1-mm zirconia/silica beads (BioSpec  
321 Products) in 1 mL of Denaturation/Lysis Solution (Life Technologies) for 15 min. RNA was extracted  
322 from this lysate using the RNeasy Mini Kit (QIAGEN).

323 For the diel experiment, we used a phenol-chloroform-isoamyl extraction<sup>26</sup> after confirming  
324 good mRNA recovery from both diatom and bacterial samples. To determine the absolute number  
325 of transcripts, two internal mRNA standards (size, 1,000 nt) were added to each sample before  
326 extraction and the recovery of the standards was determined following Satinsky et al.<sup>23</sup>. After the  
327 extraction, DNA was removed by the Turbo DNA-free Kit (Ambion), rRNA was depleted by Ribo-Zero  
328 rRNA Removal Kit (Illumina), and mRNA was purified by RNA Clean & Concentrator-5 (Zymo  
329 Research) following the manufacturer's protocols.

330 Sequencing was carried out on an Illumina NextSeq 550 (Table S5). rRNA reads were  
331 identified by blast+ (NCBI 2.7.1 and 2.8.1 for the direct light experiment and the diel experiment,  
332 respectively) against an rRNA sequence database and removed. Remaining reads were mapped  
333 to the *R. pomeroyi* genome and quantified using HTSeq<sup>61</sup>. Differentially expressed genes were  
334 identified in pairwise comparisons of sampling times (diel experiment) or light levels (direct light  
335 experiment) using MATLAB for absolute analysis, and DESeq2<sup>62</sup> for relative transcript analysis. One  
336 of the replicate samples from the initial time point of the experiment was lost; otherwise, n = 3 for  
337 all analyses. The number of reads per library averaged  $19.2 \times 10^6$  (range,  $13.3\text{--}31.9 \times 10^6$ ) and the  
338 percentage of rRNA contamination averaged 17.5% (range, 4.1–38.8%). Recovery of the two internal  
339 standards was highly consistent (Pearson's  $r = 0.96$ ;  $p \leq 0.001$ ;  $n = 26$ ), accounting for 2.2% of mRNA  
340 reads recovered per library. All other statistical analyses were conducted using MATLAB. Fold-  
341 change values and temporal pattern categories for all the genes are reported in Table S6.

342 *Cell counts*- A 0.5 mL aliquot of culture was fixed with glutaraldehyde (final concentration,  
343 1%) and kept at -80°C until analysis. Samples were thawed, stained with SYBR Green I (Thermo  
344 Fisher Scientific; final concentration,  $5 \times 10^{-4}$  of commercial stock), and injected into a CytoFLEX flow  
345 cytometer (Beckman Coulter). For phytoplankton counts, samples were analyzed without staining.  
346 Data were analyzed using CytExpert (Beckman Coulter), and cell density was calculated based on a  
347 separate run of a known concentration of bead standards (Beckman Coulter).

348 *Model development* – The extracellular release model was written in R version 3.6.1 with  
349 three state variables, representing the phytoplankton endometabolome ( $P$ ), the exometabolome ( $E$ ),  
350 and the bacterial endometabolome ( $B$ ). The time evolution of these pools was calculated at 0.1 h  
351 intervals using the following differential equations.

$$\delta_t P = N X - T - R$$



$$\delta_t E = R - U$$

$$\delta_t B = U - C$$

352  $N$  is the metabolite biosynthesis rate, derived from light intensity but allowing for C fixation-  
353 irradiance oscillation around the peak in light intensity<sup>32</sup>.  $T$  is the rate at which endometabolites are  
354 allocated for biomass and energy generation by phytoplankton cells, calculated as a constant  
355 fraction of  $P$  at each interval.  $R$  is release rate of endometabolites from the phytoplankton cell with  
356 parameters for both diffusive and physiological balance mechanisms.  $U$  represents bacterial uptake  
357 from the exometabolome following Michaelis-Menten kinetics.  $X$  is the bacterial response  
358 mechanism that increases metabolite biosynthesis rate in the presence of bacteria by 1.5- or 2-fold.  
359  $C$  represents catabolism of the metabolite within the bacterial endometabolome, with a constant  
360 fraction lost each interval. See Supplemental Methods for information on how variables  $N$ ,  $R$ ,  $T$ ,  $U$ ,  
361 and  $C$  were calculated.

362 To simulate experimental conditions,  $B$  and  $U$  were set to zero for 6 d of ‘axenic growth’  
363 followed by ‘inoculation’ with addition of  $B$  and  $U$  functions for the final 4 d of the modeled  
364 experiment. Values for  $P$  and  $U$  from the final 2 d of model output were used to compare to  
365 experimentally measured endometabolome and transcriptome data, respectively.

366 *Experimental test of model predictions – T. pseudonana* CCMP1335 was inoculated into L1  
367 medium with  $\text{NaH}^{13}\text{CO}_3$  labeling as described above. Triplicate samples were inoculated with three  
368 heterotrophic bacteria (*Ruegeria pomeroyi* DSS-3, *Stenotrophomonas* sp. SKA-14, and *Polaribacter*  
369 *dokdonensis* MED-152). Another set of triplicate samples was kept axenic (diatom only). The cultures  
370 were maintained at  $160 \mu\text{mol photons m}^{-2} \text{ s}^{-1}$  at  $18^\circ\text{C}$  in a 16:8 h light:dark cycle. After 15 d (late  
371 stationary phase) diatom cells were filtered from 700 mL of culture, frozen and processed for NMR  
372 analysis as described above.

373 **Data Availability Statement**

374 Data that support the findings of this study have been deposited in NCBI SRA with BioProject  
375 accession number PRJNA649292 (sequencing data), and Metabolomics Workbench with Project ID  
376 PR001019, [dx.doi.org/10.21228/M80408](https://dx.doi.org/10.21228/M80408) (metabolome data).

### 377 **Acknowledgements**

378 C. Smith and S. Sharma provided sequencing and bioinformatic assistance, J. Gluhka and C.  
379 Panagos offered expertise on NMR analysis, M. Landa and B. Nowinski provided valuable comments  
380 on experimental design, F. Ferrer-González and J. Schreier assisted with sampling, and the University  
381 of Georgia Genomics and Bioinformatics Core (GGBC) provided sequencing services. This work was  
382 supported by The Gordon and Betty Moore Foundation (5503), NSF (IOS-1656311), The Simons  
383 Foundation (grant 542391 to MAM) within the Principles of Microbial Ecosystems (PriME)  
384 Collaborative, JSPS (Research Fellowship for Young Scientists and Grant-in-Aid for JSPS Fellows to  
385 MU), and the Swedish Research Council (2018-06571 to MO).

386

### 387 **Author Contributions**

388 MU and MAM conceived of the study, MU and MO collected the data, MU, WS, MO, ASE,  
389 and MAM analyzed data, and MU and MAM wrote the paper with input from all authors.

### 390 **Conflict of Interest Statement**

391 The authors declare no conflicts of interest.

## References

- 1 Williams, P. J. I. in *Microbial Ecology of the Oceans* (ed D. L. Kirchman) 153–200. (Wiley-Liss,, 2000).
- 2 Becker, K. W. *et al.* Daily changes in phytoplankton lipidomes reveal mechanisms of energy storage in the open ocean. *Nature Comm* **9** (2018).
- 3 Boysen, A. K. *et al.* Diel oscillations of particulate metabolites reflect synchronized microbial activity in the North Pacific Subtropical Gyre. *bioRxiv*, 2020.2005.2009.086173 (2020).
- 4 Durham, B. P. *et al.* Sulfonate-based networks between eukaryotic phytoplankton and heterotrophic bacteria in the surface ocean. *Nat Microbiol* **4**, 1706-1715 (2019).
- 5 Aylward, F. O. *et al.* Microbial community transcriptional networks are conserved in three domains at ocean basin scales. *Proc Nat Acad Sci* **112**, 5443-5448 (2015).
- 6 Gasol, J. M. *et al.* Diel variations in bacterial heterotrophic activity and growth in the northwestern Mediterranean Sea. *Mar Ecol Prog Ser* **164**, 107-124 (1998).
- 7 Azam, F. *et al.* The ecological role of water-column microbes in the sea. *Mar Ecol Prog Ser* **10**, 257-263 (1983).
- 8 Cole, J. J., Findlay, S. & Pace, M. L. Bacterial production in fresh and saltwater ecosystems - a cross-system overview. *Mar Ecol Prog Ser* **43**, 1-10 (1988).
- 9 Moran, M. A. *et al.* Deciphering ocean carbon in a changing world. *Proc Nat Acad Sci* **113**, 3143-3151 (2016).
- 10 Nagata, T. in *Microbial Ecology of the Oceans* (ed D. L. Kirchman) 207–241 (John Wiley and Sons, Inc., 2008).
- 11 Kujawinski, E. B. The impact of microbial metabolism on marine dissolved organic matter. *Ann Rev Mar Sci* **3**, 567-599 (2011).
- 12 Seymour, J. R., Amin, S. A., Raina, J. B. & Stocker, R. Zooming in on the phycosphere: the ecological interface for phytoplankton-bacteria relationships. *Nat Microbiol* **2** (2017).
- 13 Thornton, D. C. O. Dissolved organic matter (DOM) release by phytoplankton in the contemporary and future ocean. *Eur J Phycol* **49**, 20-46 (2014).
- 14 Bjornsen, P. K. Phytoplankton exudation of organic-matter - why do healthy cells do it. *Limnol Oceanogr* **33**, 151-154 (1988).
- 15 Fogg, G. E. The ecological significance of extracellular products of phytoplankton photosynthesis. *Bot Mar* **26**, 3-14 (1983).
- 16 Amin, S. A. *et al.* Interaction and signalling between a cosmopolitan phytoplankton and associated bacteria. *Nature* **522**, 98-101 (2015).
- 17 Durham, B. P. *et al.* Recognition cascade and metabolite transfer in a marine bacteria-phytoplankton model system. *Environ Microbiol* **19**, 3500-3513 (2017).
- 18 Armbrust, E. V. *et al.* The genome of the diatom *Thalassiosira pseudonana*: ecology, evolution, and metabolism. *Science* **306**, 79-86 (2004).
- 19 Moran, M. A. *et al.* Genome sequence of *Silicibacter pomeroyi* reveals adaptations to the marine environment. *Nature* **432**, 910-913 (2004).

- 20 Uitz, J., Claustre, H., Gentili, B. & Stramski, D. Phytoplankton class-specific primary production in the world's oceans: Seasonal and interannual variability from satellite observations. *Global Biogeochem Cycles* **24** (2010).
- 21 Buchan, A., LeClerc, G. R., Gulvik, C. A. & Gonzalez, J. M. Master recyclers: features and functions of bacteria associated with phytoplankton blooms. *Nat Rev Microbiol* **12**, 686-698 (2014).
- 22 Luo, H. W. & Moran, M. A. Evolutionary ecology of the marine Roseobacter clade. *Microbiol Mol Biol R* **78**, 573-587 (2014).
- 23 Satinsky, B. M., Gifford, S. M., Crump, B. C. & Moran, M. A. in *Methods in Enzymology* (ed E. F. DeLong) 237-250 (2013).
- 24 Moran, M. A. *et al.* Sizing up metatranscriptomics. *ISME J* **7**, 237-243 (2013).
- 25 Durham, B. P. *et al.* Cryptic carbon and sulfur cycling between surface ocean plankton. *Proc Nat Acad Sci* **112**, 453-457 (2015).
- 26 Landa, M., Burns, A. S., Roth, S. J. & Moran, M. A. Bacterial transcriptome remodeling during sequential co-culture with a marine dinoflagellate and diatom. *ISME J* **11**, 2677-2690 (2017).
- 27 Schwämmle, V. & Jensen, O. N. VSclust: feature-based variance-sensitive clustering of omics data. *Bioinformatics* **34**, 2965-2972 (2018).
- 28 Becker, S. *et al.* Laminarin is a major molecule in the marine carbon cycle. *Proc Nat Acad Sci* **117**, 6599-6607 (2020).
- 29 Neidhardt, F., Ingraham, J. & Schaechter, S. *Physiology of the bacterial cell: a molecular approach*. (Sinauer Associates Inc, 1990).
- 30 Wagner, G. P., Kin, K. & Lynch, V. J. Measurement of mRNA abundance using RNA-seq data: RPKM measure is inconsistent among samples. *Theory Biosci* **131**, 281-285 (2012).
- 31 Harding, L., Meeson, B., Prézelin, B. & Sweeney, B. Diel periodicity of photosynthesis in marine phytoplankton. *Mar Biol* **61**, 95-105 (1981).
- 32 Harding, L., Prézelin, B., Sweeney, B. & Cox, J. Diel oscillations of the photosynthesis-irradiance (PI) relationship in natural assemblages of phytoplankton. *Mar Biol* **67**, 167-178 (1982).
- 33 Behrenfeld, M. J., Halsey, K. H. & Milligan, A. J. Evolved physiological responses of phytoplankton to their integrated growth environment. *Phil Trans Royal Soc B: Biol Sci* **363**, 2687-2703 (2008).
- 34 Behrenfeld, M. J., Prasil, O., Babin, M. & Bruyant, F. In search of a physiological basis for covariations in light-limited and light-saturated photosynthesis. *J Phycol* **40**, 4-25 (2004).
- 35 Blough, N. V. & Zepp, R. G. in *Active oxygen in chemistry* 280-333 (Springer, 1995).
- 36 Zafiriou, O. C., Jousot-Dubien, J., Zepp, R. G. & Zika, R. G. Photochemistry of natural waters. *Environ Sci Technol* **18**, 358A-371A (1984).
- 37 Ziegelhoffer, E. C. & Donohue, T. J. Bacterial responses to photo-oxidative stress. *Nat Rev Microbiol* **7**, 856-863 (2009).
- 38 Lubin, E. A., Henry, J. T., Fiebig, A., Crosson, S. & Laub, M. T. Identification of the PhoB regulon and role of PhoU in the phosphate starvation response of *Caulobacter crescentus*. *J Bacteriol* **198**, 187-200 (2016).

- 39 Yang, C. *et al.* Genome-wide PhoB binding and gene expression profiles reveal the hierarchical gene regulatory network of phosphate starvation in *Escherichia coli*. *Plos One* **7** (2012).
- 40 Hsieh, Y. J. & Wanner, B. L. Global regulation by the seven-component Pi signaling system. *Curr Opin Microbiol* **13**, 198-203 (2010).
- 41 Kuipers, B., van Noort, G. J., Vosjan, J. & Herndl, G. J. Diel periodicity of bacterioplankton in the euphotic zone of the subtropical Atlantic Ocean. *Mar Ecol Prog Ser* **201**, 13-25 (2000).
- 42 Muratore, D. *et al.* Community-scale synchronization and temporal partitioning of gene expression, metabolism, and lipid biosynthesis in oligotrophic ocean surface waters. *bioRxiv*, 2020.2005.2015.098020 (2020).
- 43 Denger, K., Lehmann, S. & Cook, A. M. Molecular genetics and biochemistry of N-acetyltaurine degradation by *Cupriavidus necator* H16. *Microbiol-Sgm* **157**, 2983-2991 (2011).
- 44 Lidbury, I., Murrell, J. C. & Chen, Y. Trimethylamine N-oxide metabolism by abundant marine heterotrophic bacteria. *Proc Nat Acad Sci* **111**, 2710-2715 (2014).
- 45 Mou, X. Z., Sun, S. L., Rayapati, P. & Moran, M. A. Genes for transport and metabolism of spermidine in *Ruegeria pomeroyi* DSS-3 and other marine bacteria *Aquat Micro Ecol* **59**, 102-102 (2010).
- 46 Schulz, A. *et al.* Feeding on compatible solutes: A substrate-induced pathway for uptake and catabolism of ectoines and its genetic control by EnuR. *Environ Microbiol* **19**, 926-946 (2017).
- 47 Weinitschke, S., Sharma, P. I., Stingl, U., Cook, A. M. & Smits, T. H. Gene clusters involved in isethionate degradation by terrestrial and marine bacteria. *Appl Environ Microb* **76**, 618-621 (2010).
- 48 Nowinski, B. & Moran, M. A. Identifying marine bacterial niche dimensions by an experimental invasion. *submitted* (2021).
- 49 Ottesen, E. A. *et al.* Pattern and synchrony of gene expression among sympatric marine microbial populations. *P Natl Acad Sci USA* **110**, E488-E497 (2013).
- 50 Guillard, R. R. L. & Hargraves, P. E. *Stichochrysis immobilis* is a diatom, not a chrysophyte. *Phycologia* **32**, 234-236 (1993).
- 51 Uchimiya, M., Tsuboi, Y., Ito, K., Date, Y. & Kikuchi, J. Bacterial substrate transformation tracked by stable-isotope-guided NMR metabolomics: application in a natural aquatic microbial community. *Metabolites* **7**, 52 (2017).
- 52 Lewis, I. A., Schommer, S. C. & Markley, J. L. rNMR: open source software for identifying and quantifying metabolites in NMR spectra. *Mag Res Chem* **47**, S123-S126 (2009).
- 53 Wishart, D. S. *et al.* HMDB 3.0-The Human Metabolome Database in 2013. *Nuc Acids Res* **41**, D801-D807 (2013).
- 54 Ulrich, E. L. *et al.* BioMagResBank. *Nuc Acids Res* **36**, D402-D408 (2008).
- 55 Toukach, P. V. & Egorova, K. S. Carbohydrate structure database merged from bacterial, archaeal, plant and fungal parts. *Nucl Acids Res* **44**, D1229-D1236 (2016).
- 56 Landa, M. *et al.* Sulfur metabolites that facilitate oceanic phytoplankton-bacteria carbon flux. *Isme J* **13**, 2536-2550 (2019).

- 57 Boroujerdi, A. F. B. *et al.* Identification of isethionic acid and other small molecule metabolites of *Fragilariopsis cylindrus* with nuclear magnetic resonance. *Anal Bioanal Chem* **404**, 777-784 (2012).
- 58 Walejko, J. M., Chelliah, A., Keller-Wood, M., Gregg, A. & Edison, A. S. Global metabolomics of the placenta reveals distinct metabolic profiles between maternal and fetal placental tissues following delivery in non-labored women. *Metabolites* **8**, 10 (2018).
- 59 Thaben, P. F. & Westermark, P. O. Detecting rhythms in time series with RAIN. *J Biological Rhythms* **29**, 391-400 (2014).
- 60 Welsh, J. CirHeatmap. (2020). <<https://github.com/joadwe/cirheatmap>>.
- 61 Anders, S., Pyl, P. T. & Huber, W. HTSeq-a Python framework to work with high-throughput sequencing data. *Bioinformatics* **31**, 166-169 (2015).
- 62 Love, M. I., Huber, W. & Anders, S. Moderated estimation of fold change and dispersion for RNA-seq data with DESeq2. *Genome Biol* **15** (2014).
- 63 Schulz, A. *et al.* Feeding on compatible solutes: A substrate - induced pathway for uptake and catabolism of ectoines and its genetic control by EnuR. *Environ Microbiol* **19**, 926-946 (2017).
- 64 Lidbury, I., Kimberley, G., Scanlan, D. J., Murrell, J. C. & Chen, Y. Comparative genomics and mutagenesis analyses of choline metabolism in the marine Roseobacter clade. *Environ Microbiol* **17**, 5048-5062 (2015).
- 65 Cunliffe, M. Purine catabolic pathway revealed by transcriptomics in the model marine bacterium *Ruegeria pomeroyi* DSS-3. *FEMS Microbiol Ecol* **92**, fiv150 (2016).

Table 1. Diatom endometabolites assigned with high confidence in the diel experiment. For detailed information for compound identification and confidence level information, see Table S1 and Fig. S1. Group assignments correspond to those in Figure 1. Statistical significance for temporal patterns is based on linear regression analysis for increasing or decreasing patterns, and RAIN for diel cycles. Temporal patterns: M1 = increase, M2 = decrease, M3 = diel with a peak at mid-afternoon, M4 = diel with a peak at noon. n.a., not applicable (membership value of <0.5, see text for the detail).

| Compound category/<br>Sub-category | Compound                          | Function                             | Group, temporal pattern |
|------------------------------------|-----------------------------------|--------------------------------------|-------------------------|
| Amine                              | Trimethylamine N-oxide            |                                      | n.a.                    |
| Amino acid                         | Ala                               | Amino acid metabolism                | n.a.                    |
|                                    | Arg                               | Amino acid metabolism                | n.a.                    |
|                                    | Asn                               | Amino acid metabolism                | M-1 ( $p < 0.001$ )     |
|                                    | Asp                               | Amino acid metabolism                | M-4 ( $p < 0.01$ )      |
|                                    | Gln                               | Amino acid metabolism                | M-4 ( $p < 0.001$ )     |
|                                    | Glu                               | Amino acid metabolism                | n.a.                    |
|                                    | Gly                               | Amino acid metabolism                | M-1 ( $p < 0.01$ )      |
|                                    | Lys                               | Amino acid metabolism                | M-1 ( $p < 0.001$ )     |
|                                    | Pro                               | Amino acid metabolism/osmoregulation | M-4 ( $p < 0.001$ )     |
| Amino acid/Branched-chain          | Val                               | Amino acid metabolism                | n.a.                    |
|                                    | Ile                               | Amino acid metabolism                | M-1 ( $p < 0.001$ )     |
|                                    | Leu                               | Amino acid metabolism                | M-1 ( $p < 0.001$ )     |
| Amino acid derivative              | Glycine betaine                   | Osmoregulation                       | M-1 ( $p < 0.05$ )      |
|                                    | Dimethylglycine                   |                                      | n.a.                    |
|                                    | Homarine                          | Osmoregulation                       | M-1 ( $p < 0.05$ )      |
| Amino alcohol                      | Ethanolamine                      | Lipid metabolism                     | M-1 ( $p < 0.01$ )      |
| Choline                            | Choline                           | Lipid metabolism                     | n.a.                    |
| Choline derivative                 | Phosphorylcholine                 | Lipid metabolism                     | M-1 ( $p < 0.001$ )     |
| Phosphocholine                     | Glycerophosphocholine             | Lipid metabolism                     | n.a.                    |
| Glycerol derivative                | Glycerol 3-phosphate              | Lipid metabolism                     | M-1 ( $p < 0.01$ )      |
| Nucleoside                         | Adenosine                         | Nucleic acids/ATP constituent        | n.a.                    |
|                                    | Guanosine                         | Nucleic acids/GTP constituent        | M-4                     |
|                                    | Uridine                           |                                      | M-3 ( $p < 0.001$ )     |
| Organic acid                       | 3-Hydroxybutyrate                 | Carbon metabolism                    | M-2 ( $p < 0.01$ )      |
|                                    | Acetate                           | Carbon metabolism                    | M-2 ( $p < 0.01$ )      |
|                                    | 4-Hydroxyphenylacetate            |                                      | n.a.                    |
|                                    | Dicarboxylic acids (unidentified) | Carbon metabolism                    | M-2 ( $p < 0.05$ )      |
| Sugar/Monosaccharide               | Glucose                           | Carbon/central energy metabolism     | M-3 ( $p < 0.001$ )     |
| Sugar/Polysaccharide               | $\beta(1,3)$ -glucan              | Carbon metabolism/storage            | M-3 ( $p < 0.001$ )     |
| Sulfur compound                    | DHPS                              | Osmoregulation                       | M-1 ( $p < 0.001$ )     |
|                                    | DMSP                              | Osmoregulation                       | M-1 ( $p < 0.001$ )     |

Table 2. Bacterial noon/night ratios of transcripts cell<sup>-1</sup> for genes indicative of metabolite consumption. Bold font indicates the compounds appearing in both the endometabolite and bacterial gene expression datasets. n.s., difference not statistically significant (adjusted  $p > 0.05$ ).

|                       | Compound                       | Gene locus tag | Gene name   | Protein function                                       | Noon/Night transcript ratio | Reference |
|-----------------------|--------------------------------|----------------|-------------|--------------------------------------------------------|-----------------------------|-----------|
| Amide                 | Urea                           | SPO1707        | <i>urtD</i> | ABC transporter, ATP-binding protein                   | 43.0                        | 19        |
|                       |                                | SPO1708        | <i>urtC</i> | ABC transporter, permease                              | 37.7                        |           |
|                       |                                | SPO1709        | <i>urtB</i> | ABC transporter, permease                              | 34.6                        |           |
|                       |                                | SPO1710        | <i>urtA</i> | ABC transporter, substrate binding                     | 0.8 (n.s.)                  |           |
| Amine                 | TMAO                           | SPO1548        | <i>tmoX</i> | ABC transporter, periplasmic binding                   | 38.0                        | 44        |
|                       |                                | SPO1550        | <i>tmoV</i> | ABC transporter, permease protein                      | 41.2                        |           |
|                       |                                | SPO1549        | <i>tmoW</i> | ABC transporter, ATP binding                           | 43.1                        |           |
| Amine                 | TMA                            | SPO1551        | <i>tmm</i>  | TMA monooxygenase                                      | 42.6                        | 19        |
| Amino acid derivative | Betaine                        | SPO3186        | <i>opuD</i> | Glycine-betaine transporter                            | 1.6 (n.s.)                  | 19        |
| Amino Acid            | <b>Leucine</b>                 | SPO2793        | <i>ivD</i>  | isovaleryl-CoA dehydrogenase                           | 2.6                         |           |
|                       |                                | SPO2789        | <i>mccA</i> | methylcrotonyl-CoA carboxylase, alpha subunit          | 3.1                         |           |
|                       |                                | SPO2790        | <i>mccB</i> | methylcrotonyl-CoA carboxylase, beta subunit           | 3.4                         |           |
|                       |                                | SPO0390        |             | glutamate/leucine/phenylalanine/valine dehydrogenase   | 1.2 (n.s.)                  |           |
| Amino acid derivative | Ectoine/ 5-hydroxyectoine      | SPO1146        | <i>uehB</i> | TRAP transporter, small integral membrane protein      | 48.4                        | 63        |
|                       |                                | SPO1147        | <i>uehA</i> | TRAP transporter, large integral membrane protein      | 29.7                        |           |
|                       |                                | SPO1145        | <i>uehC</i> | TRAP transporter, periplasmic binding                  | 36.7                        |           |
| Amino Acid            | <b>Proline</b>                 | SPO1031        |             | hypothetical protein                                   | 21.2                        |           |
|                       |                                | SPO2441        |             | ABC transporter, periplasmic betaine/proline-binding   | 16.4                        |           |
|                       |                                | SPOA0231       |             | ABC transporter, periplasmic substrate-binding         | 43.3                        |           |
| Choline               | Choline                        | SPO1087        | <i>betT</i> | Choline transporter                                    | 0.9 (n.s.)                  | 64        |
| Glycerol derivative   | <b>SN-glycerol-3-phosphate</b> | SPO0238        | <i>ugpE</i> | ABC transporter, permease                              | 4.3                         | 19        |
|                       |                                | SPO0239        | <i>ugpA</i> | ABC transporter, permease                              | 3.3                         |           |
|                       |                                | SPO0237        | <i>ugpC</i> | ABC transporter, ATP-binding                           | 3.5                         |           |
|                       |                                | SPO0240        | <i>ugpB</i> | ABC transporter, periplasmic substrate-binding protein | 1.3 (n.s.)                  |           |
|                       |                                |                |             |                                                        |                             |           |
| Nucleoside            | Xanthine                       | SPO0654        | <i>xdhA</i> | Xanthine dehydrogenase, A subunit                      | 33.4                        | 65        |
|                       |                                | SPO0653        | <i>xdhB</i> | Xanthine dehydrogenase, B subunit                      | 33.0                        |           |
|                       |                                | SPO0652        | <i>xdhC</i> | Xanthine dehydrogenase accessory factor                | 25.8                        |           |
| Nucleoside            | <b>Uridine</b>                 | SPO2470        | <i>iunH</i> | inosine-uridine preferring nucleoside hydrolase        | 9.9                         |           |
| Organic Acid          | <b>Acetate</b>                 | SPO1813        | <i>acs</i>  | acetyl-coenzyme A synthetase                           | 0.9 (n.s.)                  |           |
|                       |                                | SPO0325        | <i>phbB</i> | acetoacetyl-CoA reductase                              | 1.9                         |           |
|                       |                                | SPO0326        | <i>phbA</i> | acetyl-CoA acetyltransferase                           | 1.1 (n.s.)                  |           |
| Organic acid          | Glycolate                      | SPO3478        | <i>glcD</i> | glycolate oxidase, GlcD subunit                        | 18.6                        | 19        |
|                       |                                | SPO3479        | <i>glcE</i> | glycolate oxidase, GlcE subunit                        | 19.9                        |           |



|                 |                                    |          |               |                                                        |            |    |
|-----------------|------------------------------------|----------|---------------|--------------------------------------------------------|------------|----|
|                 |                                    | SPO3480  | <i>glcF</i>   | glycolate oxidase, iron-sulfur subunit                 | 21.6       |    |
| Phosphonate     | Phosphonate                        | SPO0780  | <i>phnC</i>   | ABC transporter, ATP-binding                           | 32.4       |    |
|                 |                                    | SPO0781  | <i>phnD</i>   | ABC transporter, periplasmic phosphonate-binding       | 18.6       |    |
| Polyamine       | Putrescine                         | SPO0782  | <i>phnE-1</i> | ABC transporter, permease                              | 38.3       |    |
|                 |                                    | SPO0783  | <i>phnE-2</i> | ABC transporter, permease                              | 35.6       |    |
|                 |                                    | SPO3469  | <i>potF</i>   | ABC transporter, periplasmic putrescine-binding        | 1.2        | 45 |
|                 |                                    | SPO3466  | <i>potI</i>   | ABC transporter, permease                              | 2.5        |    |
|                 |                                    | SPO3467  | <i>potH</i>   | ABC transporter, permease                              | 2.6        |    |
| Polyamine       | Spermidine                         | SPO3468  | <i>potG</i>   | ABC transporter, ATP-binding                           | 2.1        |    |
|                 |                                    | SPOA0381 |               | ABC transporter, periplasmic substrate-binding protein | 22.7       | 45 |
|                 |                                    | SPOA0383 |               | ABC transporter, permease protein                      | 53.4       |    |
|                 |                                    | SPOA0384 |               | ABC transporter, permease protein                      | 42.7       |    |
| Sugar           | Ribose                             | SPOA0382 |               | ABC transporter, ATP-binding protein                   | 29.2       |    |
|                 |                                    | SPOA0253 |               | ABC transporter, periplasmic substrate-binding         | 30.9       | 26 |
|                 |                                    | SPOA0254 | <i>rbsC-1</i> | ABC transporter, permease                              | 54.9       |    |
|                 |                                    | SPOA0256 |               | ABC transporter, periplasmic substrate-binding protein | 21.4       |    |
|                 |                                    | SPOA0257 | <i>rbsC-2</i> | ABC transporter, permease                              | 50.4       |    |
| Sugar           | Glucose/Xylose                     | SPOA0258 | <i>rbsA</i>   | ABC transporter, ATP-binding                           | 55.7       |    |
|                 |                                    | SPO0861  | <i>xylF</i>   | ABC transporter, periplasmic substrate-binding         | 2.7 (n.s.) | 26 |
|                 |                                    | SPO0862  | <i>xylH</i>   | ABC transporter, permease                              | 6.2        |    |
|                 |                                    | SPO0863  | <i>xylG</i>   | ABC transporter, ATP-binding                           | 4.2        |    |
| Sulfur compound | Choline-O-sulfate                  | SPO1083  | <i>betC</i>   | Choline sulfatase                                      | 15.1       | 64 |
| Sulfur compound | Cysteate                           | SPO2658  |               | ABC transporter, periplasmic substrate-binding         | 22.4       | 56 |
|                 |                                    | SPO2659  |               | ABC transporter, permease                              | 38.3       |    |
|                 |                                    | SPO2660  |               | ABC transporter, permease                              | 28.0       |    |
|                 |                                    | SPO2661  |               | ABC transporter, ATP-binding                           | 32.7       |    |
|                 |                                    | SPO0591  | <i>hpsK</i>   | TRAP transporter                                       | 13.0       | 25 |
| Sulfur compound | Dihydroxypropane-sulfonate (DHPS)  | SPO0592  | <i>hpsL</i>   | TRAP transporter                                       | 32.3       |    |
|                 |                                    | SPO0593  | <i>hpsM</i>   | TRAP transporter                                       | 24.5       |    |
|                 |                                    | SPO1913  | <i>dmdA</i>   | DMSP demethylase                                       | 15.0       | 56 |
| Sulfur compound | Dimethylsulfonio-propionate (DMSP) | SPO0453  | <i>dddW</i>   | DMSP lyase                                             | 30.7       |    |
|                 |                                    | SPO1703  | <i>dddD</i>   | DMSP lyase                                             | 41.3       |    |
|                 |                                    | SPO2299  | <i>dddP</i>   | DMSP lyase                                             | 31.4       |    |
|                 |                                    | SPO1596  | <i>dddQ</i>   | DMSP lyase                                             | 19.2       |    |
|                 |                                    | SPO2358  | <i>iseK</i>   | TRAP transporter, periplasmic                          | 30.0       | 56 |
| Sulfur compound | Isethionate                        | SPO2357  | <i>iseL</i>   | TRAP transporter, small permease                       | 13.2       |    |
|                 |                                    | SPO2356  | <i>iseM</i>   | TRAP transporter, DctM                                 | 38.2       |    |
|                 |                                    | SPO0660  | <i>naaA</i>   | ABC transporter, periplasmic substrate-binding         | 54.3       | 56 |
| Sulfur compound | <i>N</i> -acetyltaurine            | SPO0661  | <i>naaB</i>   | ABC transporter, permease                              | 32.3       |    |
|                 |                                    | SPO0662  | <i>naaB'</i>  | ABC transporter, permease                              | 42.7       |    |

|                 |         |         |              |                                                |            |               |
|-----------------|---------|---------|--------------|------------------------------------------------|------------|---------------|
|                 |         | SPO0663 | <i>naaC</i>  | ABC transporter, ATP-binding                   | 58.2       |               |
|                 |         | SPO0664 | <i>naaC'</i> | ABC transporter, ATP-binding                   | 28.2       |               |
| Sulfur compound | Taurine | SPO0674 | <i>tauA</i>  | ABC transporter, periplasmic substrate-binding | 1.8 (n.s.) | <sup>56</sup> |
|                 |         | SPO0675 | <i>tauB</i>  | ABC transporter, ATP-binding                   | 3.7        |               |
|                 |         | SPO0676 | <i>tauC</i>  | ABC transporter, permease                      | 3.1        |               |

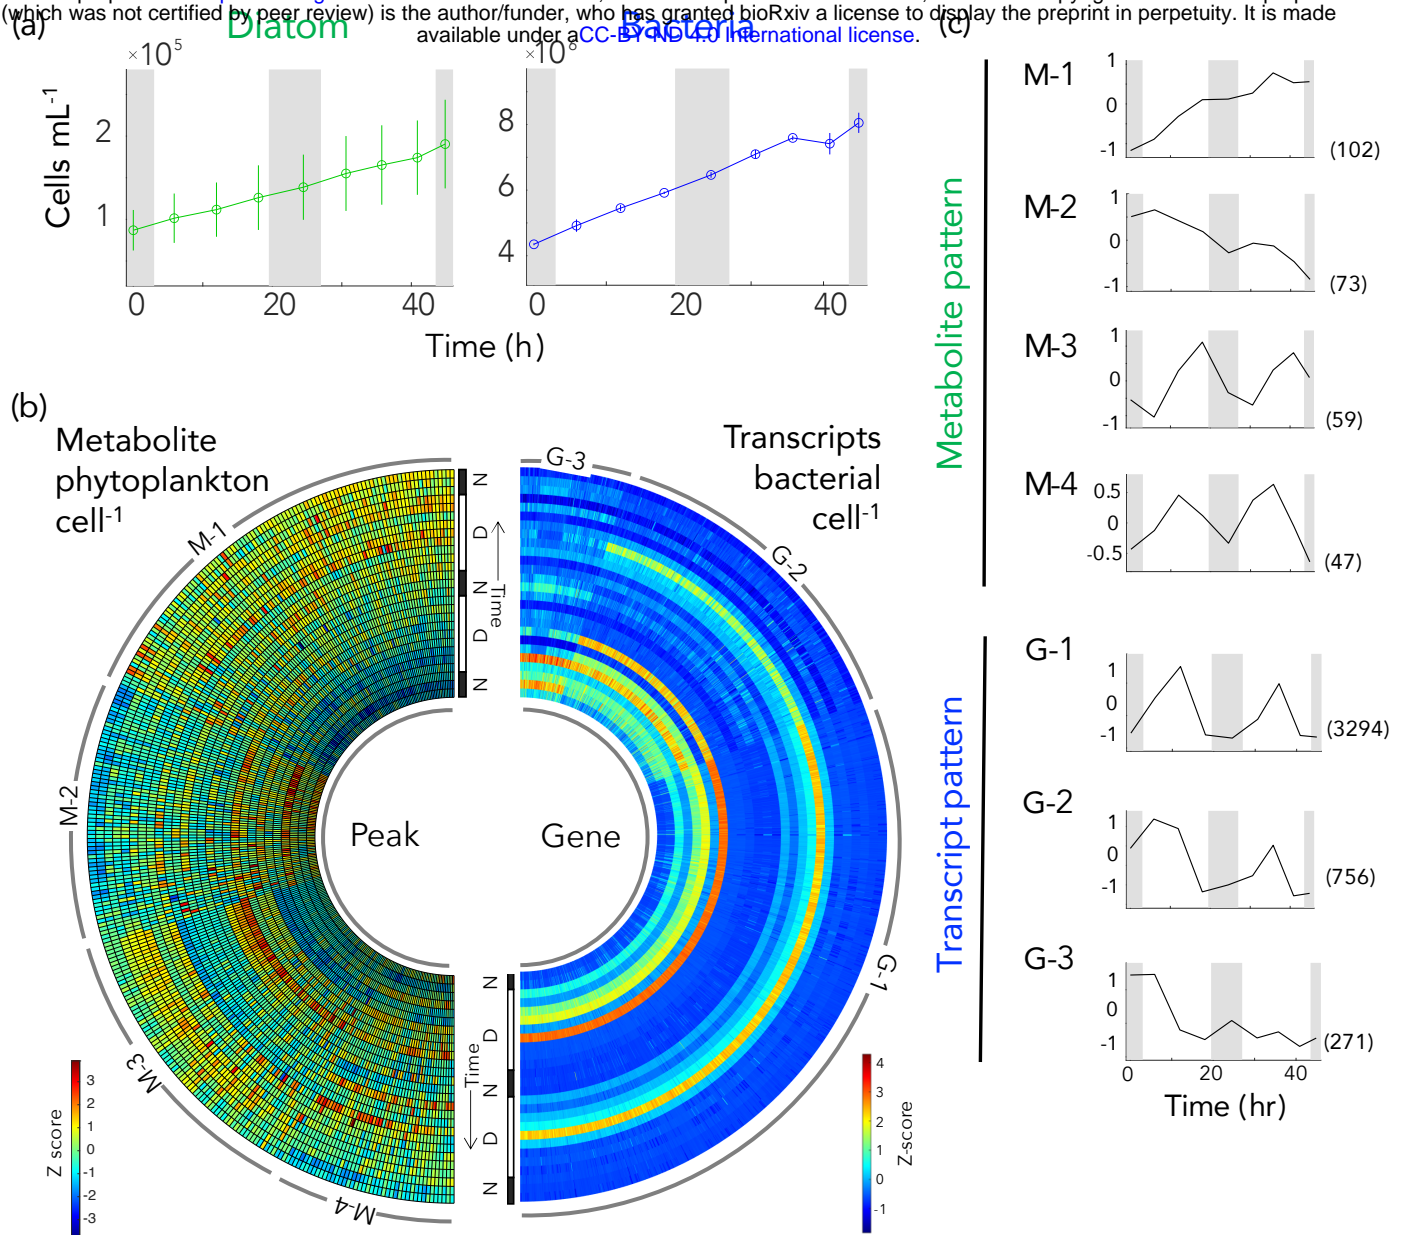

Figure 1. (a) Cell numbers of co-cultured diatoms and bacteria. (b) Temporal variations in metabolite concentration per diatom cell (left) and transcripts per bacterial cell (right) for genes differentially expressed between noon and night ( $\geq 2$  fold-change and DESeq2 adjusted- $p \leq 0.05$ ). Values were converted to Z-scores and data from each of the three biological replicates are shown. (c) Temporal patterns identified for metabolites (M-1 through M-4) and gene transcription (G-1 through G-3). The number of metabolite peaks or genes in each cluster is given in parentheses. Grey shading in panels a and c indicates night.

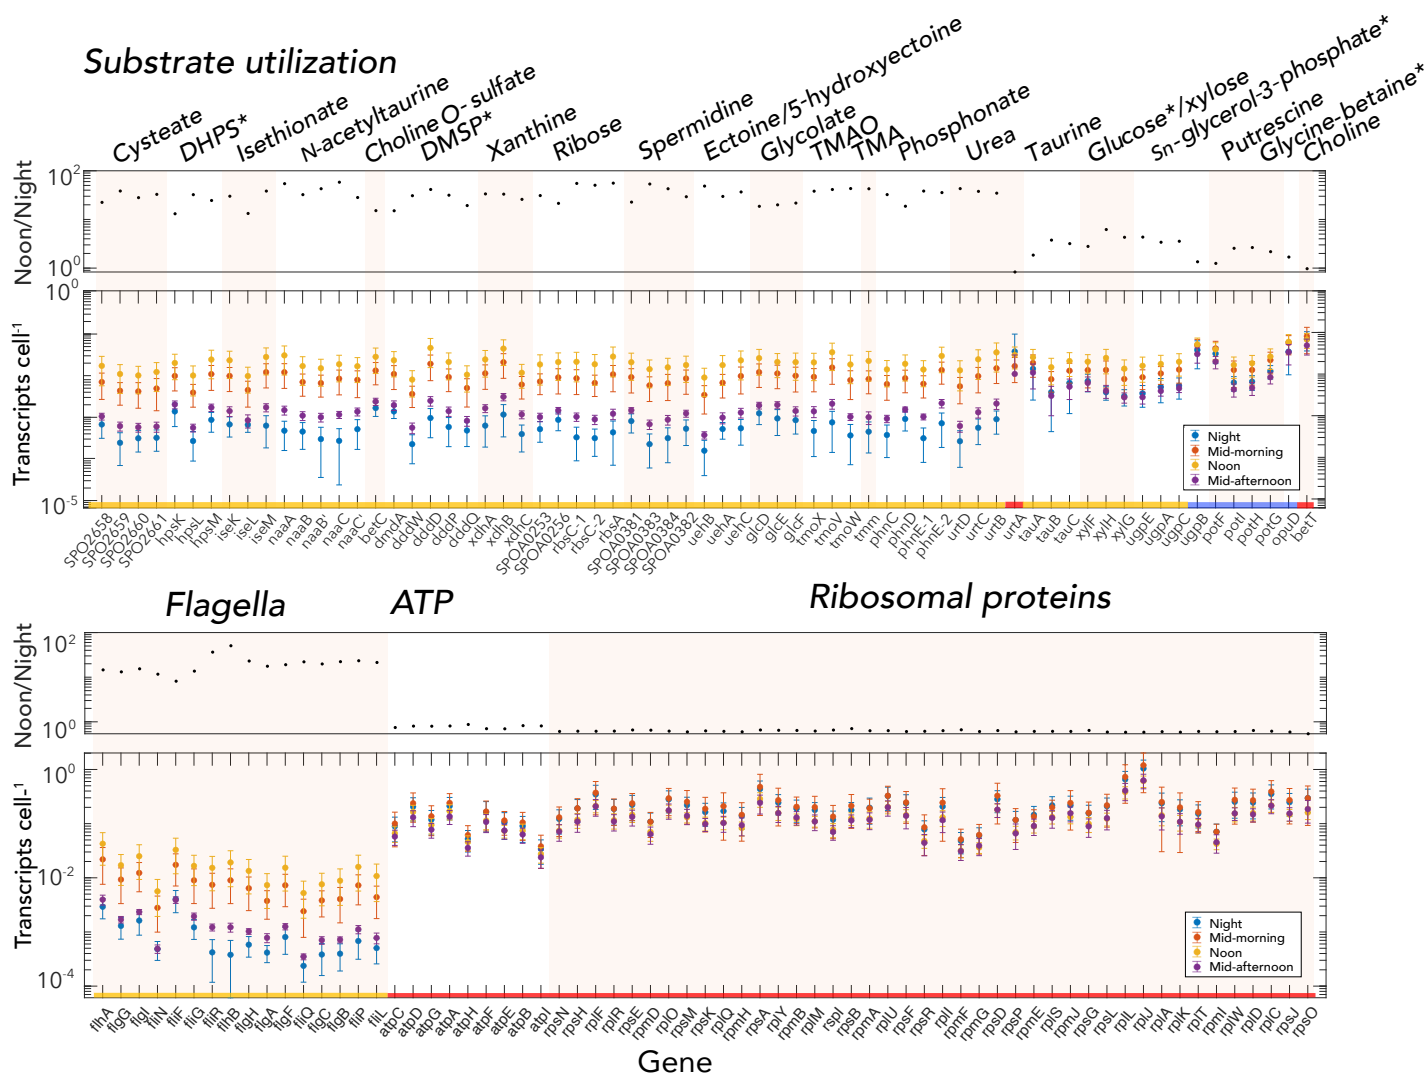

Figure 2. Expression levels of representative *R. pomeroiy* genes encoding transporters or diagnostic catabolic genes (top) and flagella, ATPases, and ribosomal proteins (bottom). For each panel, the top plot shows noon to night ratios (black circles), and the bottom plot shows average transcripts cell<sup>-1</sup> at night, mid-morning, noon, and mid-afternoon. Error bars indicate standard deviations. Categories of transcription temporal patterns (G-1, gold; G-2, blue, G-3, red) are indicated along the x-axis. Asterisks indicate transporters whose target substrate matches an endometabolite identified with high confidence.

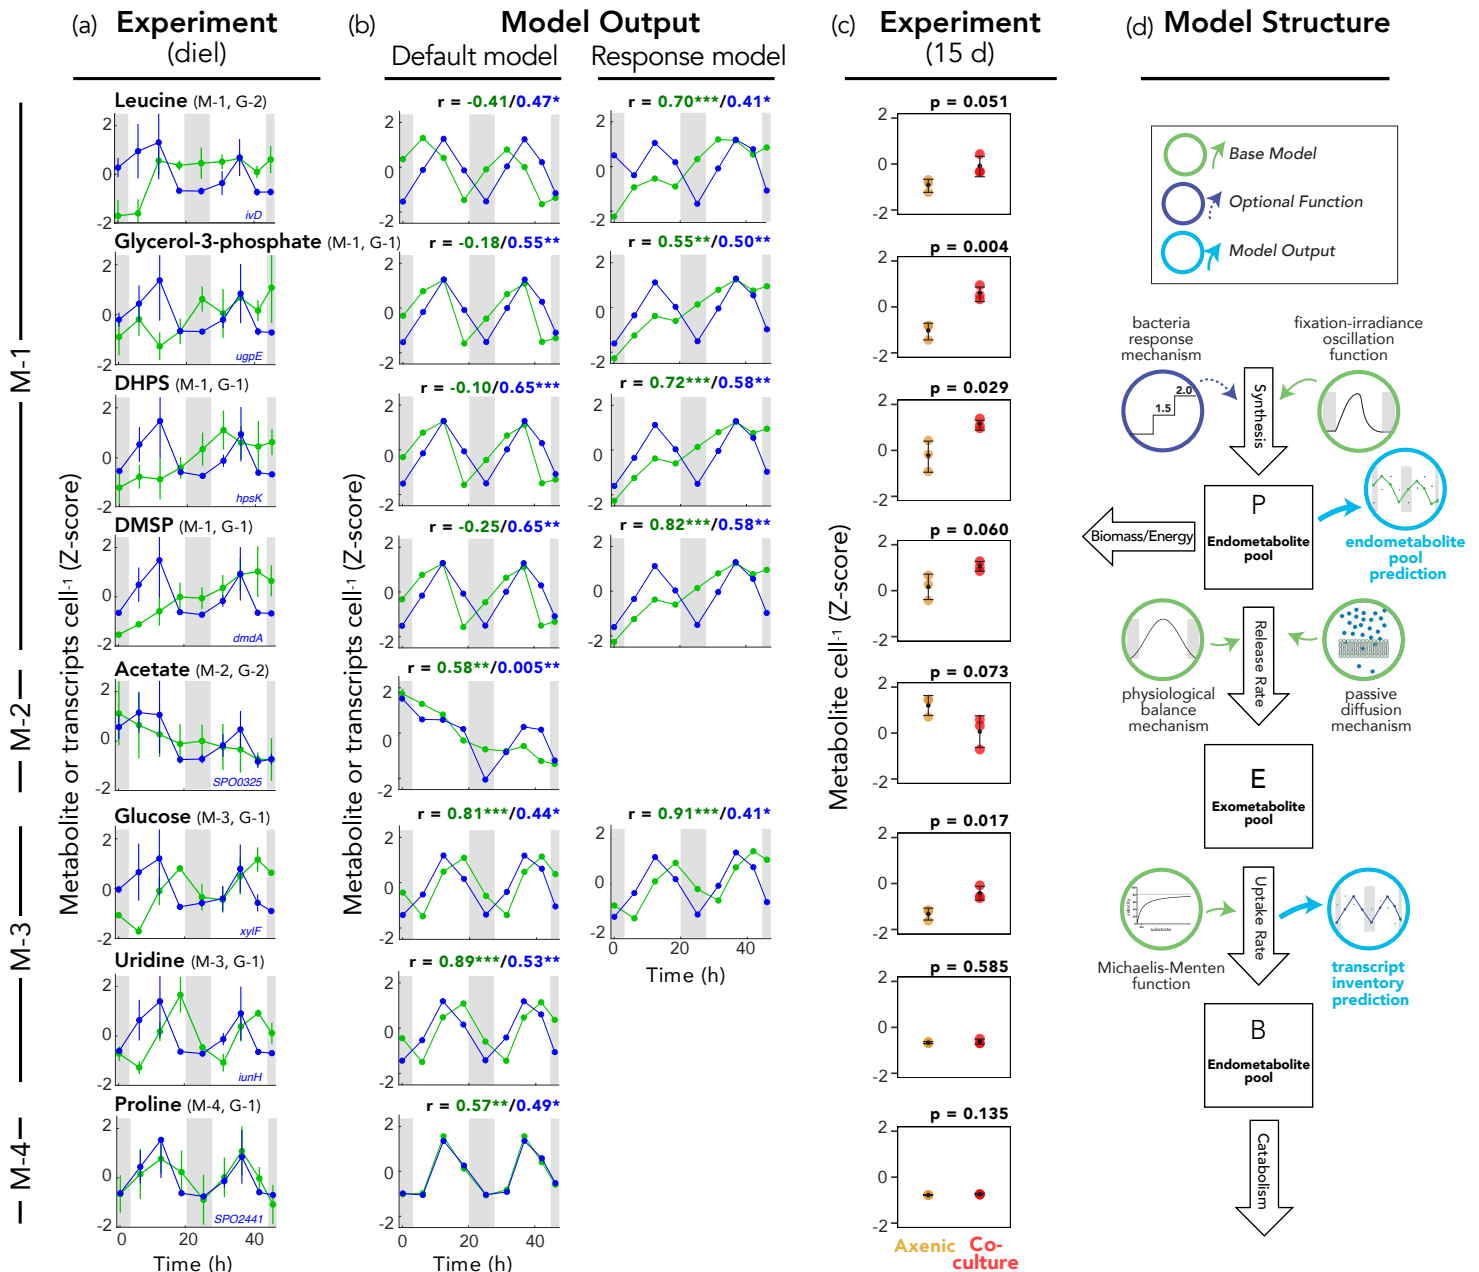

Figure 3. (a) Comparison of temporal patterns for diatom endometabolite concentration (green symbols) and bacterial transcript inventory for a representative gene encoding uptake or catabolism of the same compound (blue symbols); additional relevant genes are shown in Figure S8 (mean  $\pm$  standard deviation,  $n=3$  except for the first night where  $n=2$ ). (b) Corresponding information from the model output for default (left) and response (right) models. Numbers above the plots indicate  $r$  values for Pearson correlations between experimental and model data for metabolite concentrations (green font) and transcript inventories (blue font). \*,  $p \leq 0.05$ ; \*\*,  $p \leq 0.01$ ; \*\*\*,  $p \leq 0.001$ . (c) Comparison of diatom endometabolite concentrations in axenic culture versus bacterial co-culture (mean  $\pm$  standard deviation,  $n=3$ ). Numbers above the plots indicate t-test  $p$  values ( $n=3$ ). (d) Structure of simulation model.

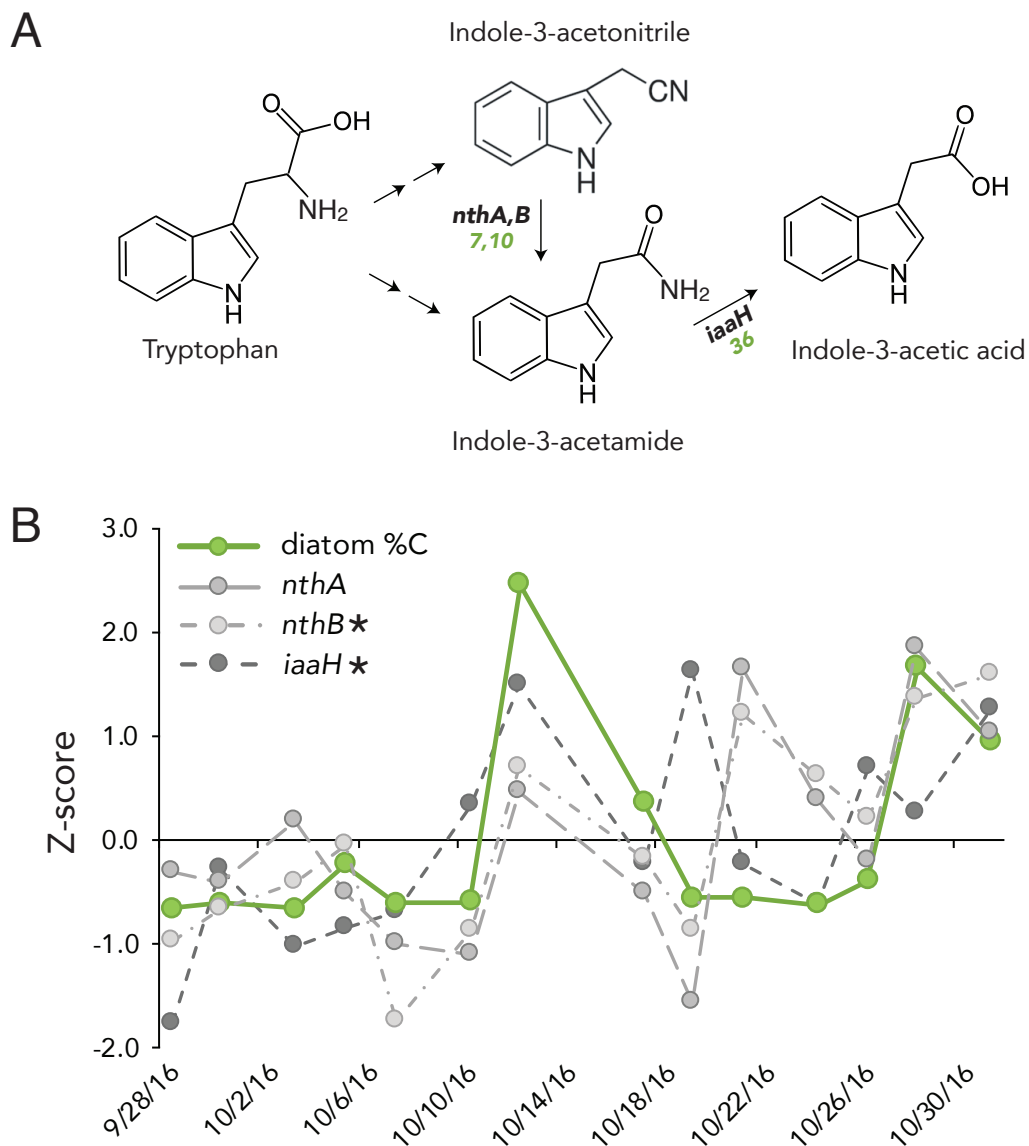

Figure 4. A) Indole-3-acetic acid (IAA) synthesis pathways in *R. pomeroyi*. *nithA,B*, nitrile hydratase; *iaaH*, IAM hydrolase; green text, noon/night per cell transcript inventories. B) Expression of *R. pomeroyi* IAA synthesis genes (gray symbols) following inoculation into natural phytoplankton bloom communities from Monterey Bay, CA, USA. Bacteria were added at 3-4 d intervals over a 1 mo period, with mRNA retrieved for transcriptome sequencing 90 min after inoculation<sup>48</sup>. The percent of phytoplankton carbon in the bloom community contributed by diatoms (green symbols) was calculated from microscopic cell counts and taxon-specific cell volumes. Data are Z-scores of mean values for three replicates. Asterisks indicate *R. pomeroyi* genes whose expression is positively correlated with diatom % C (Pearson's  $R \geq 0.54$ ;  $p \leq 0.05$ ).
