# Supplementary material for: Diel Investments in Phytoplankton Metabolite Production Influenced by Associated Heterotrophic Bacteria
Source: bioRxiv or medRxiv preprint supplement (doi:10.1101/2020.11.18.388827), 2020-11-20
Supplement: Supplementary file [file media-4.pdf]

Table S3. Summary of model output for the default and bacteria response models. Pearson correlations and  $p$  values between experimental and model data for metabolites and corresponding genes are shown. n.a., not applicable.

| Metabolite or gene name/locus tag |                      | Pattern category | Default model |         | Recognition model |        |
|-----------------------------------|----------------------|------------------|---------------|---------|-------------------|--------|
|                                   |                      |                  | $r$           | $p$     | $r$               | $p$    |
| <b>Metabolites</b>                |                      |                  |               |         |                   |        |
|                                   | Leucine              | M-1              | -0.412        | 0.033   | 0.701             | 0.000  |
|                                   | Glycerol 3-phosphate | M-1              | -0.181        | 0.365   | 0.554             | 0.003  |
|                                   | DHPS                 | M-1              | -0.104        | 0.605   | 0.725             | 0.000  |
|                                   | DMSP                 | M-1              | -0.246        | 0.217   | 0.824             | 0.000  |
|                                   | Acetate              | M-2              | 0.580         | 0.002   | n.a.              | n.a.   |
|                                   | Glucose              | M-3              | 0.807         | 0.000   | 0.913             | 0.000  |
|                                   | Uridine              | M-3              | 0.887         | 0.000   | n.a.              | n.a.   |
|                                   | Proline              | M-4              | 0.567         | 0.002   | n.a.              | n.a.   |
| <b>Genes</b>                      |                      |                  |               |         |                   |        |
|                                   | <i>Leucine</i> ivD   | G-2              | 0.22          | < 0.05  | 0.17              | < 0.05 |
|                                   | mccA                 | G-2              | 0.30          | < 0.01  | 0.21              | < 0.05 |
|                                   | SPO0390              | G-2              | 0.01          | 0.73    | 0.07              | 0.18   |
| <i>Glycerol 3-phosphate</i>       | SPO0731              | G-1              | 0.34          | < 0.01  | 0.26              | < 0.05 |
|                                   | ugpE                 | G-1              | 0.32          | < 0.01  | 0.25              | < 0.05 |
|                                   | SPO0369              | G-1              | 0.44          | < 0.001 | 0.35              | < 0.01 |
| <i>DHPS</i>                       | hpsK                 | G-1              | 0.42          | < 0.001 | 0.33              | < 0.01 |
|                                   | hpsN                 | G-1              | 0.42          | < 0.001 | 0.34              | < 0.01 |
| <i>DMSP</i>                       | dmdA                 | G-1              | 0.42          | < 0.001 | 0.34              | < 0.01 |
|                                   | dddW                 | G-1              | 0.45          | < 0.001 | 0.36              | < 0.01 |
|                                   | dddD                 | G-1              | 0.42          | < 0.001 | 0.34              | < 0.01 |
|                                   | dddP                 | G-1              | 0.44          | < 0.001 | 0.36              | < 0.01 |
| <i>Acetate</i>                    | SPO0325              | G-2              | 0.26          | < 0.05  | n.a.              | n.a.   |
|                                   | SPO0326              | G-2              | 0.29          | < 0.01  | n.a.              | n.a.   |
| <i>Glucose</i>                    | galM                 | G-1              | 0.32          | < 0.01  | 0.31              | < 0.01 |
|                                   | xyfF                 | G-1              | 0.19          | < 0.05  | 0.17              | < 0.05 |
| <i>Uridine</i>                    | iunH                 | G-1              | 0.28          | < 0.05  | n.a.              | n.a.   |
| <i>Proline</i>                    | SPO1031              | G-1              | 0.25          | < 0.05  | n.a.              | n.a.   |
|                                   | SPO2441              | G-1              | 0.24          | < 0.05  | n.a.              | n.a.   |
|                                   | SPOA0231             | G-1              | 0.27          | < 0.05  | n.a.              | n.a.   |
