# Supplementary material for: Diel Investments in Phytoplankton Metabolite Production Influenced by Associated Heterotrophic Bacteria
Source: bioRxiv or medRxiv preprint supplement (doi:10.1101/2020.11.18.388827), 2020-11-20
Supplement: Supplementary file [file media-5.pdf]

Table S4. Instrument settings for NMR experiments.

| Experiment (program name by Bruker)                          | Corresponding figure and table | Spectral width/offset (ppm) |            | Size of FID |     | Number of scans |
|--------------------------------------------------------------|--------------------------------|-----------------------------|------------|-------------|-----|-----------------|
|                                                              |                                | f2                          | f1         | f2          | f1  |                 |
| $^1\text{H}$ - $^{13}\text{C}$ HSQC (hsqcetgpprsisp2.2)      | Figure 1, 3, S2, S8, and S9    | 14.2/4.7                    | 40.0/68.0  | 1024        | 96  | 16              |
|                                                              | Fig. S1; Table S1              | 14.2/4.7                    | 159.9/75.0 | 1024        | 256 | 256             |
| $^1\text{H}$ - $^{13}\text{C}$ HSQC-TOCSY (hsqcdietgpsisp.2) | Fig. S1                        | 14.2/4.7                    | 189.9/90.0 | 1024        | 256 | 256             |
| $^1\text{H}$ - $^{13}\text{C}$ HMBC (hmbcetgpl2nd)           | Fig. S1                        | 12.0/4.7                    | 140/70.0   | 5768        | 390 | 96              |
