# Supplementary material for: Diel Investments in Phytoplankton Metabolite Production Influenced by Associated Heterotrophic Bacteria
Source: bioRxiv or medRxiv preprint supplement (doi:10.1101/2020.11.18.388827), 2020-11-20
Supplement: Supplementary file [file media-6.pdf]

Table S5. Summary of transcriptome sequence data. #reads, raw reads. #QC, number of reads passing quality control. QC%, percent of reads passing quality control. rRNA, number of reads identified as rRNA, %rRNA, percent of reads identified as rRNA, MTST5, number of reads identified as internal standard 5. MTST6, number of reads identified as internal standard 6. MTST\_total, sum of MTST5 and MTST6 reads. std%, percent of reads identified as internal standards. #ReadsLeft, mRNA reads remaining for analysis. n.a., not applicable.

| ID  | Sample                                  | #reads     | #QC        | QC%   | rRNA      | rRNA% | MTST5   | MTST6     | MTST_total | std% | #ReadsLeft |
|-----|-----------------------------------------|------------|------------|-------|-----------|-------|---------|-----------|------------|------|------------|
| E05 | Co-culture experiment, Night1-1         | 13,498,405 | 12,363,245 | 91.59 | 3,406,623 | 27.6  | 166,618 | 608,592   | 775,210    | 6.3  | 8,181,412  |
| F04 | Co-culture experiment, Night1-2         | 15,502,853 | 14,168,744 | 91.39 | 2,786,395 | 19.7  | 140,544 | 482,014   | 622,558    | 4.4  | 10,759,791 |
| F02 | Co-culture experiment, Mid-morning1-1   | 16,837,562 | 15,353,979 | 91.19 | 1,712,502 | 11.2  | 129,664 | 403,709   | 533,373    | 3.5  | 13,108,104 |
| E01 | Co-culture experiment, Mid-morning1-2   | 17,807,607 | 16,244,554 | 91.22 | 3,132,687 | 19.3  | 176,739 | 576,341   | 753,080    | 4.6  | 12,358,787 |
| E10 | Co-culture experiment, Mid-morning1-3   | 19,910,294 | 18,205,466 | 91.44 | 2,953,724 | 16.2  | 115,098 | 270,503   | 385,601    | 2.1  | 14,866,141 |
| F03 | Co-culture experiment, Noon1-1          | 19,275,856 | 17,722,932 | 91.94 | 1,164,010 | 6.6   | 115,767 | 324,058   | 439,825    | 2.5  | 16,119,097 |
| D08 | Co-culture experiment, Noon1-2          | 19,685,509 | 18,037,235 | 91.63 | 1,825,730 | 10.1  | 312,628 | 990,970   | 1,303,598  | 7.2  | 14,907,907 |
| E02 | Co-culture experiment, Noon1-3          | 19,408,658 | 17,720,533 | 91.30 | 966,890   | 5.5   | 81,101  | 241,754   | 322,855    | 1.8  | 16,430,788 |
| E11 | Co-culture experiment, Mid-afternoon1-1 | 20,885,480 | 19,054,538 | 91.23 | 3,581,342 | 18.8  | 324,456 | 959,900   | 1,284,356  | 6.7  | 14,188,840 |
| E12 | Co-culture experiment, Mid-afternoon1-2 | 17,557,260 | 16,073,027 | 91.55 | 3,914,892 | 24.4  | 261,021 | 719,276   | 980,297    | 6.1  | 11,177,838 |
| E03 | Co-culture experiment, Mid-afternoon1-3 | 16,977,882 | 15,523,460 | 91.43 | 1,406,118 | 9.1   | 348,476 | 1,057,642 | 1,406,118  | 9.1  | 12,711,224 |
| D12 | Co-culture experiment, Night2-1         | 23,851,789 | 22,079,516 | 92.57 | 7,073,693 | 32.0  | 233,505 | 1,014,268 | 1,247,773  | 5.7  | 13,758,050 |
| F07 | Co-culture experiment, Night2-2         | 19,469,653 | 17,836,736 | 91.61 | 3,663,942 | 20.5  | 197,821 | 734,821   | 932,642    | 5.2  | 13,240,152 |
| F09 | Co-culture experiment, Night2-3         | 31,934,931 | 29,269,343 | 91.65 | 5,338,425 | 18.2  | 479,384 | 1,609,432 | 2,088,816  | 7.1  | 21,842,102 |

|      |                                            |            |            |       |            |      |         |           |           |      |            |
|------|--------------------------------------------|------------|------------|-------|------------|------|---------|-----------|-----------|------|------------|
| D10  | Co-culture experiment, Mid-morning2-1      | 20,554,827 | 18,824,484 | 91.58 | 2,744,962  | 14.6 | 186,059 | 571,690   | 757,749   | 4.0  | 15,321,773 |
| D11  | Co-culture experiment, Mid-morning2-2      | 13,279,747 | 12,174,740 | 91.68 | 1,927,329  | 15.8 | 203,698 | 551,681   | 755,379   | 6.2  | 9,492,032  |
| E04  | Co-culture experiment, Mid-morning2-3      | 14,605,987 | 13,367,467 | 91.52 | 2,215,170  | 16.6 | 109,203 | 347,448   | 456,651   | 3.4  | 10,695,646 |
| E06  | Co-culture experiment, Noon2-1             | 19,722,654 | 18,019,139 | 91.36 | 1,623,225  | 9.0  | 136,858 | 395,528   | 532,386   | 3.0  | 15,863,528 |
| E08  | Co-culture experiment, Noon2-2             | 28,885,375 | 26,482,283 | 91.68 | 1,079,553  | 4.1  | 117,326 | 323,826   | 441,152   | 1.7  | 24,961,578 |
| F06  | Co-culture experiment, Noon2-3             | 21,993,618 | 20,024,426 | 91.05 | 2,301,998  | 11.5 | 165,550 | 518,511   | 684,061   | 3.4  | 17,038,367 |
| E09  | Co-culture experiment, Mid-afternoon2-1    | 22,556,906 | 20,538,846 | 91.05 | 3,499,739  | 17.0 | 334,172 | 1,166,834 | 1,501,006 | 7.3  | 15,538,101 |
| F08  | Co-culture experiment, Mid-afternoon2-2    | 19,472,311 | 17,798,623 | 91.40 | 2,893,773  | 16.3 | 191,917 | 749,108   | 941,025   | 5.3  | 13,963,825 |
| D09  | Co-culture experiment, Mid-afternoon2-3    | 13,658,878 | 12,514,100 | 91.62 | 3,167,132  | 25.3 | 266,044 | 762,316   | 1,028,360 | 8.2  | 8,318,608  |
| E07  | Co-culture experiment, Night3-1            | 18,841,406 | 17,419,067 | 92.45 | 6,766,726  | 38.8 | 147,411 | 492,285   | 639,696   | 3.7  | 10,012,645 |
| F01  | Co-culture experiment, Night3-2            | 15,647,403 | 14,312,249 | 91.47 | 2,959,371  | 20.7 | 145,088 | 638,394   | 783,482   | 5.5  | 10,569,396 |
| F05  | Co-culture experiment, Night3-3            | 16,962,656 | 15,604,901 | 92.00 | 4,147,196  | 26.6 | 220,930 | 803,400   | 1,024,330 | 6.6  | 10,433,375 |
| 0-1  | Direct light experiment, light level 0%-1  | 25,586,505 | 24,300,490 | 94.97 | 6,613,045  | 27.2 | n.a.    | n.a.      | n.a.      | n.a. | 17,687,445 |
| 0-2  | Direct light experiment, light level 0%-2  | 31,663,480 | 30,051,703 | 94.91 | 10,646,884 | 35.4 | n.a.    | n.a.      | n.a.      | n.a. | 19,404,819 |
| 0-3  | Direct light experiment, light level 0%-3  | 26,282,421 | 24,902,417 | 94.75 | 9,821,337  | 39.4 | n.a.    | n.a.      | n.a.      | n.a. | 15,081,080 |
| 50-1 | Direct light experiment, light level 50%-1 | 32,174,743 | 30,533,445 | 94.90 | 6,613,045  | 21.7 | n.a.    | n.a.      | n.a.      | n.a. | 21,524,552 |
| 50-2 | Direct light experiment, light level 50%-2 | 29,926,762 | 28,405,710 | 94.92 | 10,646,884 | 37.5 | n.a.    | n.a.      | n.a.      | n.a. | 17,997,524 |
| 50-3 | Direct light experiment, light level 50%-3 | 23,998,399 | 22,748,705 | 94.79 | 9,821,337  | 43.2 | n.a.    | n.a.      | n.a.      | n.a. | 11,800,777 |

|       |                                                |            |            |       |            |      |      |      |      |      |            |
|-------|------------------------------------------------|------------|------------|-------|------------|------|------|------|------|------|------------|
| 100-1 | Direct light experiment,<br>light level 100%-1 | 26,526,300 | 25,152,623 | 94.82 | 6,613,045  | 26.3 | n.a. | n.a. | n.a. | n.a. | 15,731,031 |
| 100-2 | Direct light experiment,<br>light level 100%-2 | 30,378,955 | 28,845,621 | 94.95 | 10,646,884 | 36.9 | n.a. | n.a. | n.a. | n.a. | 16,872,089 |
| 100-3 | Direct light experiment,<br>light level 100%-3 | 33,568,541 | 30,855,170 | 91.92 | 9,821,337  | 31.8 | n.a. | n.a. | n.a. | n.a. | 19,179,745 |

---
